# Supplementary material for: Measuring facility readiness to provide childbirth care: a comparison of indices using data from a health facility survey in Ethiopia
Source: PubMed Central journal article supplement (PMC8493923; doi:10.1136/bmjgh-2021-006698), 2021-10-05
Supplement: bmjgh-2021-006698supp001.pdf [file bmjgh-2021-006698supp001.pdf]

**Table S1: Detailed description of item selection for readiness indices**

| <b>Index</b>                                                     | <b>Items included</b>                                                                                                                                                                                                                                                                                                                                                                                                                                                                                                                                                                                                                                                                                                                                                                                                                                                                                                                                                                                                                                                                                                                                                                                                                                                                                                                                                                                                                                                                                          | <b>Items not included (not available in dataset)</b>                                                                                                                                                                                                                                                                                                                                                                                                                                                                                                         |
|------------------------------------------------------------------|----------------------------------------------------------------------------------------------------------------------------------------------------------------------------------------------------------------------------------------------------------------------------------------------------------------------------------------------------------------------------------------------------------------------------------------------------------------------------------------------------------------------------------------------------------------------------------------------------------------------------------------------------------------------------------------------------------------------------------------------------------------------------------------------------------------------------------------------------------------------------------------------------------------------------------------------------------------------------------------------------------------------------------------------------------------------------------------------------------------------------------------------------------------------------------------------------------------------------------------------------------------------------------------------------------------------------------------------------------------------------------------------------------------------------------------------------------------------------------------------------------------|--------------------------------------------------------------------------------------------------------------------------------------------------------------------------------------------------------------------------------------------------------------------------------------------------------------------------------------------------------------------------------------------------------------------------------------------------------------------------------------------------------------------------------------------------------------|
| WHO SARA<br>obstetric care tracer<br>items (1)                   | <p><b>Health centers (15 items; 3 domains):</b><br/> <u>Medicines and commodities (observed in facility):</u> Antibiotic eye ointment (tetracycline) for newborn; Oxytocin; Injectable antibiotic; Magnesium sulphate; Intravenous solution and infusion set;<br/> <u>Equipment:</u> Access to a functional ambulance/car on-site for emergency transportation; Sterile cord ties/clamp and scissors/blades (either in sealed delivery kit or separate); Functional suction apparatus for use with catheter and/or manual suction device for fluid extraction; Obstetric forceps and/or functioning electrical vacuum extractor; D&amp;C kit and/or MVA; Self-inflating bag and newborn masks (size 0 and size 1) for resuscitation; Delivery bed; Sterile gloves;<br/> <u>Staff and training:</u> FMOH Management protocol on selected obstetric topics, 2010 (2)<sup>1</sup>; Skilled birth attendant present or on call 24h;</p> <p><b>Hospitals (22 items; 3 domains):</b> 14 items listed above; <u>and</u><br/> <u>Medicines and commodities:</u> Blood transfusion available at all times facility open (sufficiency); Access to blood bank (safety); Lignocaine/Lidocaine;<br/> <u>Equipment:</u> Functional incubator; Sterilization equipment;<br/> <u>Staff and training:</u> Skilled provider who can perform C-section present or on call 24h; Skilled provider who can administer anesthesia</p>                                                                                                 | <p><b>Health centers (4 items):</b><br/> Examination light; Partograph, Skin disinfectant; Sterilization equipment<sup>2</sup></p> <p><b>Hospitals (13<sup>1</sup> items):</b><br/> Examination light; Partograph, Skin disinfectant; Staff trained in CEmOC; Anesthesia equipment; Blood typing; Cross match testing; Epinephrine; Halothane; Atropine; Thiopental; Suxamethonium bromide; Ketamine</p>                                                                                                                                                     |
| DHS obstetric and<br>newborn care<br>readiness indicators<br>(3) | <p><b>Health centers (30 items; 5 domains<sup>3</sup>):</b><br/> <u>Medicines and commodities (observed in delivery room or nurse/staff station):</u> Injectable antibiotic; Oxytocin; Magnesium sulphate; Intravenous solution and infusion set; Chlorohexidine gel; Antibiotic eye ointment (tetracycline) for newborn;<br/> <u>Equipment:</u> Delivery bed; Sterile cord ties/clamp and scissors/blades (either in sealed delivery kit or separate); Functional suction apparatus for use with catheter and/or manual suction device for fluid extraction; Obstetric forceps and/or functioning electrical vacuum extractor; D&amp;C kit and/or MVA; Sterile gloves; Self-inflating bag and newborn masks (size 0 and size 1) for resuscitation; Infant scale; Blood pressure apparatus; Alcohol hand scrub and/or soap and running water for staff handwashing;<br/> <u>General requirements:</u> Electricity available at all times when facility was open in last 7 days and/or back-up energy source; Water outlet on site; Functional toilet available for patient use; Skilled birth attendant present or on call 24h; Access to a functional ambulance/car on-site for emergency transportation;<br/> <u>Comprehensive emergency obstetric care:</u> Provided parenteral antibiotics for infections related to pregnancy, abortion, labor or delivery in past 3 months; Provided parenteral or oral uterotonics to prevent or treat PPH in past 3 months; Provided parenteral anticonvulsants to</p> | <p><b>Health centers (17 items):</b><br/> Performed removal of retained products in past 3 months; Practices drying and wrapping newborns; Examination light; Partograph; Hydrocortisone; Skin disinfectant; Guidelines for standard precautions; Training in neonatal resuscitation; Training in early and exclusive breastfeeding; Training in newborn infection management; Training in thermal care; Training in cord care; Training in IMPAC; Training in routine care during labor and delivery; Training in CEmOC; Training in AMTSL; Training in</p> |

|                                                                                         |                                                                                                                                                                                                                                                                                                                                                                                                                                                                                                                                                                                                                                                                                                                                                                                                                                                                                                                                                                                                                                                                                                                                                                                                                                                                                                                                                                                                                                                                                                                                                                                                                                                                                                                                                                                                                                                                                                                                                                                                                                                                                                                                                                                                                                                                                                                                                                                                                                                                                                                                                                                                                                                |                                                                                                                                                                                                                                                                                                                                                                                                                                                                         |
|-----------------------------------------------------------------------------------------|------------------------------------------------------------------------------------------------------------------------------------------------------------------------------------------------------------------------------------------------------------------------------------------------------------------------------------------------------------------------------------------------------------------------------------------------------------------------------------------------------------------------------------------------------------------------------------------------------------------------------------------------------------------------------------------------------------------------------------------------------------------------------------------------------------------------------------------------------------------------------------------------------------------------------------------------------------------------------------------------------------------------------------------------------------------------------------------------------------------------------------------------------------------------------------------------------------------------------------------------------------------------------------------------------------------------------------------------------------------------------------------------------------------------------------------------------------------------------------------------------------------------------------------------------------------------------------------------------------------------------------------------------------------------------------------------------------------------------------------------------------------------------------------------------------------------------------------------------------------------------------------------------------------------------------------------------------------------------------------------------------------------------------------------------------------------------------------------------------------------------------------------------------------------------------------------------------------------------------------------------------------------------------------------------------------------------------------------------------------------------------------------------------------------------------------------------------------------------------------------------------------------------------------------------------------------------------------------------------------------------------------------|-------------------------------------------------------------------------------------------------------------------------------------------------------------------------------------------------------------------------------------------------------------------------------------------------------------------------------------------------------------------------------------------------------------------------------------------------------------------------|
|                                                                                         | <p>manage high blood pressure in pregnancy in past 3 months; Performed manual removal of placenta in past 3 months; Provided instrument/ assisted deliveries in past 3 months;<br/> <u>Newborn signal functions and immediate care:</u> Performed neonatal resuscitation in past 3 months; Practices skin-to-skin care; Assists mother to breastfeed;<br/> <u>Guidelines, staff training, and supervision:</u><sup>3</sup> FMOH Management protocol on selected obstetric topics, 2010 (2)<sup>4</sup></p> <p><b>Hospitals (33 items; domains<sup>3</sup>):</b> 30 items listed above; <u>and</u><br/> <u>Equipment:</u> Sterilization equipment;<br/> <u>Comprehensive emergency obstetric care:</u> Performed blood transfusions for maternity care in past 3 months; Performed cesarean delivery in past 3 months</p>                                                                                                                                                                                                                                                                                                                                                                                                                                                                                                                                                                                                                                                                                                                                                                                                                                                                                                                                                                                                                                                                                                                                                                                                                                                                                                                                                                                                                                                                                                                                                                                                                                                                                                                                                                                                                       | <p>Kangaroo Mother Care;<br/>Supervision</p> <p><b>Hospitals (17 items):</b><br/>All above</p>                                                                                                                                                                                                                                                                                                                                                                          |
| <p>WHO standards for improving quality of maternal and newborn care readiness items</p> | <p><b>Health centers (44 items; 4 domains):</b><br/> <u>Equipment, supplies, and amenities:</u> Sterile cord ties/clamp and scissors/blades (either in sealed delivery kit or separate); Alcohol hand scrub and/or soap and running water for staff handwashing; Infant scale; Obstetric forceps and/or functioning electrical vacuum extractor; D&amp;C kit and/or MVA; Functional suction apparatus for use with catheter and/or manual suction device for fluid extraction; Self-inflating bag and newborn masks (size 0 and size 1) for resuscitation; Resuscitation table/trolley with light source; Electricity available at all times when facility was open in last 7 days and/or back-up energy source; Private delivery room or visual privacy ensured in delivery area; Newborn corner;<br/> <u>Medicines and commodities (observed in facility):</u> Chlorohexidine gel; Injectable vitamin K; Antibiotic eye ointment (tetracycline) for newborn; BCG vaccine; Magnesium sulphate; Calcium gluconate; At least one antihypertensive (hydralazine, nifedipine, or methyldopa); Injectable diazepam, Injectable oxytocin; Misoprostol; Injectable ergometrine; Injectable ampicillin; Injectable gentamicin; Injectable metronidazole; Dexamethasone / betamethasone; Nevirapine (NVP); Benzathine benzylpenicillin;<br/> <u>Staffing and systems to support quality:</u> Functional mechanism for reporting data on maternal deaths to the Maternal and Perinatal Death Surveillance Response; Conducts maternal death reviews; Produces monthly reports for the zonal, district, regional, or national HMIS and receives feedback on the facility's HMIS reports that includes recommendations for action; Skilled birth attendant present or on call 24h; Ratio of skilled health personnel to delivery volume meets or exceeds desired levels in FIGO statement (4); Has a performance monitoring team that meets at least quarterly; Access to a functional ambulance/car on-site for emergency transportation; Printed referral form observed; Functional system for recording and sharing outcomes of cases referred in and out;<br/> <u>Performance of signal functions:</u> Provided parenteral anticonvulsants to manage high blood pressure in pregnancy in past 3 months; Provided parenteral or oral uterotonics to prevent or treat PPH in past 3 months; Performed manual removal of placenta in past 3 months; Provided instrument/ assisted deliveries in past 3 months; Provided parenteral antibiotics for infections related to pregnancy, abortion, labor or delivery in past 3 months; Performed neonatal</p> | <p><b>Health centers and hospitals:</b><br/> <u>Items:</u><br/> Performed removal of retained products in past 3 months</p> <p><u>Quality statements:</u><br/> 2.1 Standardized medical record;<br/> 3.1 Assessment on admission for referral decision;<br/> 7.2 Staff competence and skills mix</p> <p><u>Quality standards:</u><br/> “Experience of care” standards are excluded: Effective communication; Respect and preservation of dignity; Emotional support</p> |

|  |                                                                                                                                                                                                                                                                                                                                                                                                                                                                                                                                                                                                                                                        |  |
|--|--------------------------------------------------------------------------------------------------------------------------------------------------------------------------------------------------------------------------------------------------------------------------------------------------------------------------------------------------------------------------------------------------------------------------------------------------------------------------------------------------------------------------------------------------------------------------------------------------------------------------------------------------------|--|
|  | <p>resuscitation in past 3 months; Provided antenatal corticosteroids for fetal lung maturation in past 3 months;</p> <p><b>Hospitals (52 items; 4 domains):</b> 44 items listed above; <u>and</u><br/> <u>Equipment, supplies, and amenities:</u> Sterilization equipment; Functional incubator; Oxygen supply; Pulse oximeter;</p> <p><u>Staffing and systems to support quality:</u> Skilled provider who can administer anesthesia;<br/> <u>Performance of signal functions:</u> Performed blood transfusions for maternity care in past 3 months; Performed cesarean delivery in past 3 months; Neonatal intensive care provided at facility.</p> |  |
|--|--------------------------------------------------------------------------------------------------------------------------------------------------------------------------------------------------------------------------------------------------------------------------------------------------------------------------------------------------------------------------------------------------------------------------------------------------------------------------------------------------------------------------------------------------------------------------------------------------------------------------------------------------------|--|

<sup>1</sup> WHO SARA includes two sets of guidelines: integrated management of pregnancy and childbirth (IMPAC) and comprehensive emergency obstetric care (CEmOC). The PMA Ethiopia survey measures availability of one set of national guidelines that covers both topics: FMOH management protocols on selected obstetric topics (2010).

<sup>2</sup> The PMA-ET survey assessed the availability of sterilization equipment for hospitals but not for health centers.

<sup>3</sup> The DHS program proposes a domain for 'guidelines, staff training, and supervision'; however, only a single item in this domain is available in the PMA-ET survey: FMOH management protocols on selected obstetric topics (2010). This item is included in indices generated using simple addition of items and PCA. The domain is excluded from the index generated using domain-weighted addition given the limited availability of relevant items to calculate a domain score.

<sup>4</sup> DHS includes three sets of guidelines: IMPAC, CEmOC, and preterm labor. The PMA Ethiopia survey measures availability of one set of national guidelines that covers all topics: FMOH management protocols on selected obstetric topics (2010).

Table S2. Selection of items for WHO standards childbirth readiness index

| Items                                                                   | Items included | Notes on items excluded                                                  |
|-------------------------------------------------------------------------|----------------|--------------------------------------------------------------------------|
| <b>Medicines &amp; Commodities</b>                                      |                |                                                                          |
| <i>Routine Delivery</i>                                                 |                |                                                                          |
| Urine dipsticks                                                         |                | Low discrimination                                                       |
| <i>Routine Newborn Care</i>                                             |                |                                                                          |
| Chlorohexidine gel in facility                                          | X              |                                                                          |
| Injectable vitamin K in facility                                        | X              |                                                                          |
| Tetracycline ointment in facility                                       | X              |                                                                          |
| BCG vaccine                                                             | X              |                                                                          |
| Oral polio vaccine                                                      |                | Limited variation (widely available); low discrimination                 |
| <i>Basic EmONC</i>                                                      |                |                                                                          |
| Magnesium sulphate in facility                                          | X              |                                                                          |
| Calcium gluconate in facility                                           | X              |                                                                          |
| At least one antihypertensive (hydralazine, nifedipine, or methyldopa)  | X              |                                                                          |
| Injectable diazepam in facility                                         | X              |                                                                          |
| Oxytocin in facility                                                    | X              |                                                                          |
| Misoprostol in facility                                                 | X              |                                                                          |
| Injectable ergometrine/methergine in facility                           | X              |                                                                          |
| Injectable ampicillin                                                   | X              |                                                                          |
| Injectable gentamicin                                                   | X              |                                                                          |
| Injectable metronidazole                                                | X              |                                                                          |
| IV solution in facility and infusion set (cannula, needle, and syringe) |                | Limited variation (widely available); low discrimination                 |
| <i>Comprehensive EmONC</i>                                              |                |                                                                          |
| Blood transfusion available at all times facility open                  |                | Highly correlated with performance of blood transfusion in past 3 months |
| Access to blood bank either inside or outside facility                  |                | Highly correlated with performance of blood transfusion in past 3 months |
| Lignocaine/lidocaine                                                    |                | Limited variation (widely available)                                     |
| <i>Small and Sick Newborn Care</i>                                      |                |                                                                          |
| Dexamethasone / betamethasone                                           | X              |                                                                          |
| Nevirapine (NVP)                                                        | X              |                                                                          |
| Maternal ARV regimen <sup>4</sup>                                       |                | Highly correlated with NVP                                               |
| HIV rapid test                                                          |                | Limited variation (widely available); low discrimination                 |
| Benzathine benzylpenicillin (for prevention of congenital syphilis)     | X              |                                                                          |
| Syphilis testing (VDRL)                                                 |                | Low discrimination                                                       |
| <b>Equipment, Supplies &amp; Amenities</b>                              |                |                                                                          |
| <i>Routine Delivery</i>                                                 |                |                                                                          |
| Thermometer                                                             |                | Limited variation (widely available); low discrimination                 |
| Blood pressure apparatus                                                |                | Limited variation (widely available); low discrimination                 |
| Fetal stethoscope and/or fetal scope                                    |                | Limited variation (widely available)                                     |
| Alcohol hand scrub and/or soap and running water for staff handwashing  | X              |                                                                          |
| Sterile gloves                                                          |                | Limited variation (widely available)                                     |

| Items                                                                                                    | Items included | Notes on items excluded                                  |
|----------------------------------------------------------------------------------------------------------|----------------|----------------------------------------------------------|
| Waste receptacle with lid and plastic liner                                                              |                | Low discrimination                                       |
| Sharps container                                                                                         |                | Limited variation (widely available)                     |
| Already mixed decontaminating solution (0.5% chlorine)                                                   |                | Limited variation (widely available)                     |
| <b><i>Routine Newborn Care</i></b>                                                                       |                |                                                          |
| Sterile cord ties/clamp and scissors/blades (either in sealed delivery kit or separate)                  | X              |                                                          |
| Infant weight scale                                                                                      | X              |                                                          |
| <b><i>Basic EmONC</i></b>                                                                                |                |                                                          |
| Obstetric forceps and/or functioning electrical vacuum extractor                                         | X              |                                                          |
| Dilatation and curettage (D&C) kit and/or manual vacuum aspiration (MVA) and cannula                     | X              |                                                          |
| Functional suction apparatus for use with catheter and/or manual suction device for fluid extraction     | X              |                                                          |
| Self-inflating bag and newborn masks (size 0 and size 1) for resuscitation                               | X              |                                                          |
| Resuscitation table/trolley with light source                                                            | X              |                                                          |
| <b><i>Comprehensive EmONC</i></b>                                                                        |                |                                                          |
| Functional sterilizing equipment                                                                         | X              |                                                          |
| <b><i>Small and Sick Newborn Care</i></b>                                                                |                |                                                          |
| Functional incubator                                                                                     | X              |                                                          |
| Oxygen supply                                                                                            | X              |                                                          |
| Pulse oximeter                                                                                           | X              |                                                          |
| <b><i>Amenities – Routine Delivery</i></b>                                                               |                |                                                          |
| Delivery bed                                                                                             |                | Limited variation (widely available)                     |
| Private delivery room or visual privacy ensured in delivery area                                         | X              |                                                          |
| Newborn corner                                                                                           | X              |                                                          |
| Water outlet on site                                                                                     |                | Limited variation (widely available); low discrimination |
| Electricity available at all times when facility was open in last 7 days and/or back-up energy source    | X              |                                                          |
| Functional toilet available for patient use                                                              |                | Limited variation (widely available)                     |
| <b>Staffing &amp; Systems to Support Quality</b>                                                         |                |                                                          |
| <b><i>Routine Delivery Care</i></b>                                                                      |                |                                                          |
| Skilled birth attendant present at facility or on call 24 hours                                          | X              |                                                          |
| Ratio of skilled health personnel to delivery volume meets or exceeds desired scenario in FIGO statement | X              |                                                          |
| Management protocols on selected obstetric topics (FMOH, 2010)                                           |                | Relatively rare; difficult to interpret                  |
| <b><i>Routine Newborn Care</i></b>                                                                       |                |                                                          |
| Baby-friendly guidelines                                                                                 |                | Relatively rare; difficult to interpret                  |
| <b><i>Comprehensive EmONC</i></b>                                                                        |                |                                                          |

| Items                                                                                                                | Items included | Notes on items excluded                                                                             |
|----------------------------------------------------------------------------------------------------------------------|----------------|-----------------------------------------------------------------------------------------------------|
| Skilled provider available 24h to provide C-section                                                                  |                | Highly correlated with performance of c-section in past 3 months; highly correlated with FIGO ratio |
| At least one staff trained in anesthesia                                                                             | X              |                                                                                                     |
| <b><i>Small and Sick Newborn Care</i></b>                                                                            |                |                                                                                                     |
| National Comprehensive and Integrated Prevention of Mother-to-Child Transmission of HIV Guideline (FMOH, 2015)       |                | Relatively rare; difficult to interpret                                                             |
| <b><i>Information Systems &amp; Quality Improvement Processes</i></b>                                                |                |                                                                                                     |
| Functional mechanism for reporting data on maternal deaths to the Maternal and Perinatal Death Surveillance Response | X              |                                                                                                     |
| Conducts maternal death reviews                                                                                      | X              |                                                                                                     |
| Produces monthly reports for the HMIS and receives feedback that includes recommendations for action                 | X              |                                                                                                     |
| Has a performance monitoring team that meets at least quarterly                                                      | X              |                                                                                                     |
| <b><i>Referral Systems</i></b>                                                                                       |                |                                                                                                     |
| Access to a functional ambulance/car on-site for emergency transportation                                            | X              |                                                                                                     |
| Access to phone or radio system at all times                                                                         |                | Limited variation (widely available); low discrimination                                            |
| Printed referral form observed                                                                                       | X              |                                                                                                     |
| Functional system for recording and sharing outcomes of cases referred in and out                                    | X              |                                                                                                     |
| <b>Performance of Signal Functions</b>                                                                               |                |                                                                                                     |
| <b><i>Routine Delivery</i></b>                                                                                       |                |                                                                                                     |
| Used partographs to monitor labor                                                                                    |                | Limited variation (widely available); response bias concerns                                        |
| <b><i>Routine Newborn Care</i></b>                                                                                   |                |                                                                                                     |
| Skin-to-skin care                                                                                                    |                | Limited variation (widely available); response bias concerns                                        |
| Assist mother to breastfeed                                                                                          |                | Limited variation (widely available); response bias concerns                                        |
| <b><i>Basic EmONC</i></b>                                                                                            |                |                                                                                                     |
| Provided parenteral anticonvulsants to manage high blood pressure in pregnancy                                       | X              |                                                                                                     |
| Provided parenteral or oral uterotonics to prevent or treat PPH                                                      | X              |                                                                                                     |
| Performed manual removal of placenta                                                                                 | X              |                                                                                                     |
| Provided instrument/ assisted deliveries                                                                             | X              |                                                                                                     |
| Provided parenteral antibiotics for infections related to pregnancy, abortion, labor or delivery                     | X              |                                                                                                     |
| Performed neonatal resuscitation                                                                                     | X              |                                                                                                     |
| <b><i>Comprehensive EmONC</i></b>                                                                                    |                |                                                                                                     |
| Performed blood transfusions for maternity care                                                                      | X              |                                                                                                     |
| Performed cesarean deliveries                                                                                        | X              |                                                                                                     |
| <b><i>Small and Sick Newborn Care</i></b>                                                                            |                |                                                                                                     |

| Items                                                        | Items included | Notes on items excluded |
|--------------------------------------------------------------|----------------|-------------------------|
| Provided antenatal corticosteroids for fetal lung maturation | X              |                         |
| Neonatal intensive care provided at facility                 | X              |                         |

Note: Variation refers to how widely available the item is across facilities; low variation indicates that either the item is widely available across facilities (i.e., nearly all have the item) or the item is rarely available across facilities (i.e., nearly all do not have the item) irrespective of readiness level. Discrimination refers to the ability of the item to differentiate between facilities of different levels of readiness.

**Table S3: Comparison of childbirth service readiness scores**

| Item selection         | Item aggregation           | Hospitals (n=160) |          |          | Health centers / clinics (n=246) |          |          |
|------------------------|----------------------------|-------------------|----------|----------|----------------------------------|----------|----------|
|                        |                            | Median [IQR]      | Skewness | Kurtosis | Median [IQR]                     | Skewness | Kurtosis |
| SARA tracer items      | Simple addition of items   | 0.95 [0.86-0.95]  | -1.32    | 4.34     | 0.80 [0.73-0.87]                 | -1.06    | 4.59     |
| SARA tracer items      | Weighted addition of items | 0.92 [0.85-0.97]  | -1.35    | 4.90     | 0.77 [0.71-0.88]                 | -0.65    | 4.02     |
| SARA tracer items      | PCA of items               | 0.92 [0.82-0.95]  | -2.56    | 9.98     | 0.86 [0.79-0.93]                 | -2.06    | 9.32     |
| DHS items              | Simple addition of items   | 0.94 [0.91-0.97]  | -1.55    | 5.77     | 0.80 [0.70-0.87]                 | -0.79    | 3.63     |
| DHS items <sup>1</sup> | Weighted addition of items | 0.96 [0.92-0.98]  | -1.93    | 7.39     | 0.81 [0.73-0.89]                 | -0.86    | 3.65     |
| DHS items              | PCA of items               | 0.96 [0.90-0.99]  | -4.24    | 24.89    | 0.79 [0.70-0.87]                 | -1.60    | 7.28     |
| WHO standards items    | Simple addition of items   | 0.92 [0.88-0.96]  | -1.82    | 6.91     | 0.75 [0.66-0.84]                 | -0.99    | 4.03     |
| WHO standards items    | Weighted addition of items | 0.93 [0.89-0.97]  | -2.05    | 7.99     | 0.75 [0.66-0.83]                 | -0.96    | 3.89     |
| WHO standards items    | PCA of items               | 0.94 [0.89-0.97]  | -3.36    | 16.50    | 0.79 [0.69-0.87]                 | -1.51    | 5.84     |

<sup>1</sup> Weighted addition of DHS items exclude the domain for 'guidelines, staff training, and supervision' given limited information on these items for this sample.



**Table S4a: Top 25 ranked hospitals by index**

|             | SARA tracer, simple <sup>1</sup> | SARA tracer, weighted <sup>2</sup> | SARA tracer, PCA <sup>3</sup> | DHS, simple <sup>4</sup> | DHS, weighted <sup>5</sup> | DHS, PCA | WHO standards, simple <sup>6</sup> | WHO standards, weighted <sup>7</sup> | WHO standards, PCA |
|-------------|----------------------------------|------------------------------------|-------------------------------|--------------------------|----------------------------|----------|------------------------------------|--------------------------------------|--------------------|
| 1 (highest) | 1                                | 1                                  | 3                             | 1                        | 1                          | 5        | 1                                  | 1                                    | 2                  |
| 2           | 1                                | 1                                  | 3                             | 1                        | 1                          | 5        | 1                                  | 1                                    | 2                  |
| 3           | 1                                | 1                                  | 3                             | 1                        | 1                          | 5        | 1                                  | 1                                    | 2                  |
| 4           | 1                                | 1                                  | 3                             | 1                        | 1                          | 5        | 1                                  | 1                                    | 2                  |
| 5           | 1                                | 1                                  | 3                             | 1                        | 1                          | 5        | 1                                  | 1                                    | 2                  |
| 6           | 1                                | 1                                  | 3                             | 1                        | 1                          | 5        | 1                                  | 1                                    | 2                  |
| 7           | 1                                | 1                                  | 3                             | 1                        | 1                          | 5        | 1                                  | 1                                    | 2                  |
| 8           | 1                                | 1                                  | 3                             | 1                        | 1                          | 5        | 11                                 | 16                                   | 1                  |
| 9           | 1                                | 1                                  | 3                             | 1                        | 1                          | 5        | 11                                 | 16                                   | 18                 |
| 10          | 1                                | 1                                  | 3                             | 1                        | 1                          | 5        | 25                                 | 11                                   | 11                 |
| 11          | 1                                | 1                                  | 3                             | 1                        | 1                          | 5        | 25                                 | 11                                   | 28                 |
| 12          | 1                                | 1                                  | 3                             | 1                        | 1                          | 5        | 28                                 | 16                                   | 40                 |
| 13          | 1                                | 1                                  | 3                             | 1                        | 1                          | 5        | 49                                 | 32                                   | 24                 |
| 14          | 1                                | 1                                  | 3                             | 1                        | 1                          | 5        | 11                                 | 26                                   | 70                 |
| 15          | 1                                | 1                                  | 3                             | 1                        | 1                          | 5        | 54                                 | 49                                   | 61                 |
| 16          | 1                                | 1                                  | 3                             | 1                        | 1                          | 5        | 75                                 | 49                                   | 45                 |
| 17          | 35                               | 66                                 | 38                            | 23                       | 1                          | 27       | 1                                  | 1                                    | 2                  |
| 18          | 35                               | 66                                 | 38                            | 23                       | 1                          | 27       | 1                                  | 1                                    | 2                  |
| 19          | 35                               | 35                                 | 70                            | 1                        | 1                          | 5        | 11                                 | 16                                   | 29                 |
| 20          | 1                                | 1                                  | 3                             | 23                       | 108                        | 2        | 29                                 | 29                                   | 23                 |
| 21          | 35                               | 66                                 | 38                            | 23                       | 1                          | 27       | 11                                 | 11                                   | 21                 |
| 22          | 35                               | 66                                 | 38                            | 23                       | 1                          | 27       | 11                                 | 16                                   | 18                 |
| 23          | 35                               | 48                                 | 97                            | 1                        | 1                          | 5        | 11                                 | 16                                   | 36                 |
| 24          | 35                               | 35                                 | 70                            | 1                        | 1                          | 5        | 29                                 | 32                                   | 49                 |
| 25          | 1                                | 1                                  | 3                             | 23                       | 108                        | 2        | 49                                 | 47                                   | 31                 |

<sup>1</sup> 34 hospitals are tied for the highest rank using simple addition of SARA tracer items. 50 hospitals are tied for the next highest rank (#35).

<sup>2</sup> 34 hospitals are tied for the highest rank using weighted addition of SARA tracer items. 13 hospitals are tied for the next highest rank (#35).

<sup>3</sup> 34 hospitals are tied for the 3<sup>rd</sup> highest rank using PCA of SARA tracer items (#3).

<sup>4</sup> 22 hospitals are tied for the highest rank using simple addition of DHS items. 34 hospitals are tied for the next highest rank (#23).

<sup>5</sup> 32 hospitals are tied for the highest rank using weighted addition of DHS items. 10 hospitals are tied for the next highest rank (#33).

<sup>6</sup> 10 hospitals are tied for the highest rank using simple addition of WHO standards items. 14 hospitals are tied for the next highest rank (#11).

<sup>7</sup> 10 hospitals are tied for the highest rank using weighted addition of WHO standards items. 5 hospitals are tied for the next highest rank (#11).

**Table S4b: Bottom 25 ranked hospitals by index**

|              | SARA tracer,<br>simple | SARA tracer,<br>weighted | SARA tracer,<br>PCA | DHS, simple | DHS,<br>weighted | DHS, PCA | WHO<br>standards,<br>simple | WHO<br>standards,<br>weighted | WHO<br>standards,<br>PCA |
|--------------|------------------------|--------------------------|---------------------|-------------|------------------|----------|-----------------------------|-------------------------------|--------------------------|
| 136          | 129                    | 136                      | 141                 | 123         | 117              | 131      | 111                         | 100                           | 135                      |
| 137          | 144                    | 145                      | 128                 | 151         | 153              | 127      | 94                          | 104                           | 79                       |
| 138          | 129                    | 136                      | 139                 | 137         | 149              | 117      | 94                          | 126                           | 113                      |
| 139          | 144                    | 147                      | 144                 | 123         | 123              | 135      | 114                         | 130                           | 115                      |
| 140          | 129                    | 136                      | 141                 | 123         | 117              | 131      | 138                         | 140                           | 138                      |
| 141          | 129                    | 118                      | 143                 | 123         | 138              | 147      | 129                         | 136                           | 133                      |
| 142          | 129                    | 131                      | 136                 | 154         | 157              | 140      | 129                         | 120                           | 111                      |
| 143          | 115                    | 122                      | 109                 | 146         | 144              | 153      | 141                         | 141                           | 143                      |
| 144          | 115                    | 118                      | 78                  | 154         | 150              | 156      | 153                         | 152                           | 149                      |
| 145          | 129                    | 130                      | 137                 | 137         | 120              | 141      | 151                         | 149                           | 145                      |
| 146          | 115                    | 99                       | 110                 | 154         | 158              | 158      | 149                         | 151                           | 152                      |
| 147          | 144                    | 147                      | 148                 | 137         | 134              | 137      | 129                         | 134                           | 144                      |
| 148          | 148                    | 143                      | 134                 | 146         | 140              | 128      | 146                         | 143                           | 134                      |
| 149          | 129                    | 136                      | 113                 | 146         | 151              | 139      | 151                         | 150                           | 150                      |
| 150          | 129                    | 143                      | 149                 | 137         | 144              | 146      | 147                         | 147                           | 146                      |
| 151          | 153                    | 153                      | 153                 | 151         | 152              | 90       | 159                         | 158                           | 148                      |
| 152          | 158                    | 157                      | 155                 | 137         | 134              | 142      | 144                         | 146                           | 147                      |
| 153          | 148                    | 156                      | 156                 | 137         | 137              | 148      | 147                         | 148                           | 154                      |
| 154          | 153                    | 159                      | 158                 | 137         | 133              | 154      | 150                         | 153                           | 156                      |
| 155          | 148                    | 151                      | 151                 | 153         | 154              | 151      | 154                         | 154                           | 153                      |
| 156          | 160                    | 160                      | 160                 | 146         | 144              | 149      | 154                         | 156                           | 155                      |
| 157          | 153                    | 154                      | 152                 | 154         | 156              | 157      | 156                         | 155                           | 158                      |
| 158          | 153                    | 155                      | 154                 | 154         | 155              | 155      | 156                         | 157                           | 157                      |
| 159          | 153                    | 151                      | 157                 | 160         | 160              | 160      | 158                         | 159                           | 159                      |
| 160 (lowest) | 158                    | 157                      | 159                 | 159         | 159              | 159      | 160                         | 160                           | 160                      |

**Table S4c: Top 25 ranked health centers/clinics by index**

|             | SARA tracer, simple <sup>1</sup> | SARA tracer, weighted <sup>2</sup> | SARA tracer, PCA <sup>3</sup> | DHS, simple <sup>4</sup> | DHS, weighted <sup>5</sup> | DHS, PCA <sup>6</sup> | WHO standards, simple | WHO standards, weighted | WHO standards, PCA |
|-------------|----------------------------------|------------------------------------|-------------------------------|--------------------------|----------------------------|-----------------------|-----------------------|-------------------------|--------------------|
| 1 (highest) | 1                                | 1                                  | 1                             | 1                        | 1                          | 1                     | 2                     | 4                       | 2                  |
| 2           | 1                                | 1                                  | 1                             | 4                        | 10                         | 7                     | 1                     | 1                       | 1                  |
| 3           | 1                                | 1                                  | 1                             | 1                        | 1                          | 1                     | 5                     | 13                      | 10                 |
| 4           | 1                                | 1                                  | 1                             | 4                        | 10                         | 4                     | 13                    | 11                      | 9                  |
| 5           | 1                                | 1                                  | 1                             | 4                        | 10                         | 11                    | 13                    | 7                       | 26                 |
| 6           | 17                               | 67                                 | 22                            | 4                        | 1                          | 6                     | 2                     | 2                       | 3                  |
| 7           | 1                                | 1                                  | 1                             | 12                       | 23                         | 16                    | 23                    | 30                      | 20                 |
| 8           | 1                                | 1                                  | 1                             | 12                       | 32                         | 26                    | 13                    | 32                      | 11                 |
| 9           | 17                               | 17                                 | 45                            | 4                        | 5                          | 8                     | 13                    | 21                      | 16                 |
| 10          | 1                                | 1                                  | 1                             | 1                        | 1                          | 1                     | 43                    | 29                      | 77                 |
| 11          | 17                               | 17                                 | 17                            | 12                       | 18                         | 25                    | 13                    | 6                       | 32                 |
| 12          | 17                               | 17                                 | 45                            | 4                        | 5                          | 8                     | 23                    | 25                      | 27                 |
| 13          | 17                               | 67                                 | 22                            | 12                       | 21                         | 12                    | 5                     | 10                      | 7                  |
| 14          | 17                               | 67                                 | 22                            | 12                       | 7                          | 15                    | 13                    | 15                      | 13                 |
| 15          | 17                               | 17                                 | 38                            | 12                       | 23                         | 17                    | 23                    | 26                      | 19                 |
| 16          | 17                               | 67                                 | 22                            | 12                       | 10                         | 19                    | 12                    | 8                       | 25                 |
| 17          | 17                               | 17                                 | 45                            | 12                       | 36                         | 24                    | 13                    | 23                      | 18                 |
| 18          | 1                                | 1                                  | 1                             | 4                        | 7                          | 5                     | 68                    | 64                      | 60                 |
| 19          | 1                                | 1                                  | 1                             | 12                       | 58                         | 14                    | 32                    | 57                      | 36                 |
| 20          | 17                               | 17                                 | 17                            | 27                       | 43                         | 30                    | 23                    | 27                      | 23                 |
| 21          | 17                               | 67                                 | 22                            | 27                       | 23                         | 35                    | 13                    | 19                      | 14                 |
| 22          | 17                               | 67                                 | 22                            | 27                       | 23                         | 34                    | 13                    | 19                      | 17                 |
| 23          | 17                               | 67                                 | 22                            | 12                       | 10                         | 13                    | 32                    | 37                      | 33                 |
| 24          | 1                                | 1                                  | 1                             | 12                       | 23                         | 21                    | 68                    | 49                      | 75                 |
| 25          | 17                               | 17                                 | 38                            | 4                        | 10                         | 10                    | 43                    | 51                      | 71                 |

<sup>1</sup> 16 health centers/clinics are tied for the highest rank using simple addition of SARA tracer items. 45 health centers/clinics are tied for the next highest rank (#17).

<sup>2</sup> 16 health centers/clinics are tied for the highest rank using weighted addition of SARA tracer items. 23 health centers/clinics are tied for the next highest rank (#17).

<sup>3</sup> 16 health centers/clinics are tied for the highest rank using PCA of SARA tracer items. 5 health centers/clinics are tied for the next highest rank (#17).

<sup>4</sup> 3 health centers/clinics are tied for the highest rank using simple addition of DHS items. 8 health centers/clinics are tied for the next highest rank (#4).

<sup>5</sup> 4 health centers/clinics are tied for the highest rank using weighted addition of DHS items. 2 health centers/clinics are tied for the next highest rank (#5).

<sup>6</sup> 3 health centers/clinics are tied for the highest rank using PCA of DHS items. 1 health centers/clinics holds the next highest rank (#4).

**Table S4d: Bottom 25 ranked health centers/clinics by index**

|              | SARA tracer,<br>simple | SARA tracer,<br>weighted | SARA tracer,<br>PCA | DHS, simple <sup>1</sup> | DHS,<br>weighted | DHS, PCA | WHO<br>standards,<br>simple | WHO<br>standards,<br>weighted | WHO<br>standards,<br>PCA |
|--------------|------------------------|--------------------------|---------------------|--------------------------|------------------|----------|-----------------------------|-------------------------------|--------------------------|
| 222          | 217                    | 226                      | 217                 | 228                      | 221              | 227      | 202                         | 209                           | 193                      |
| 223          | 217                    | 236                      | 230                 | 184                      | 170              | 210      | 230                         | 235                           | 235                      |
| 224          | 217                    | 226                      | 228                 | 200                      | 196              | 217      | 222                         | 226                           | 220                      |
| 225          | 234                    | 239                      | 236                 | 213                      | 211              | 222      | 202                         | 211                           | 203                      |
| 226          | 217                    | 221                      | 212                 | 213                      | 215              | 206      | 230                         | 228                           | 231                      |
| 227          | 206                    | 216                      | 203                 | 228                      | 230              | 229      | 222                         | 227                           | 222                      |
| 228          | 217                    | 221                      | 220                 | 213                      | 211              | 218      | 227                         | 231                           | 234                      |
| 229          | 206                    | 216                      | 221                 | 222                      | 228              | 226      | 227                         | 234                           | 233                      |
| 230          | 217                    | 236                      | 224                 | 239                      | 238              | 233      | 215                         | 208                           | 214                      |
| 231          | 217                    | 226                      | 233                 | 231                      | 238              | 234      | 222                         | 223                           | 223                      |
| 232          | 217                    | 226                      | 228                 | 231                      | 234              | 231      | 230                         | 229                           | 226                      |
| 233          | 234                    | 232                      | 234                 | 222                      | 224              | 228      | 237                         | 232                           | 230                      |
| 234          | 234                    | 241                      | 241                 | 231                      | 235              | 240      | 222                         | 230                           | 215                      |
| 235          | 217                    | 226                      | 227                 | 231                      | 240              | 230      | 240                         | 240                           | 239                      |
| 236          | 217                    | 221                      | 235                 | 239                      | 230              | 243      | 237                         | 237                           | 232                      |
| 237          | 234                    | 232                      | 232                 | 241                      | 241              | 237      | 230                         | 236                           | 225                      |
| 238          | 234                    | 232                      | 237                 | 241                      | 243              | 235      | 230                         | 233                           | 228                      |
| 239          | 234                    | 239                      | 238                 | 231                      | 232              | 236      | 230                         | 238                           | 236                      |
| 240          | 243                    | 243                      | 243                 | 231                      | 227              | 239      | 237                         | 217                           | 238                      |
| 241          | 234                    | 232                      | 240                 | 231                      | 232              | 242      | 243                         | 244                           | 243                      |
| 242          | 234                    | 220                      | 239                 | 241                      | 245              | 241      | 242                         | 241                           | 242                      |
| 243          | 242                    | 242                      | 242                 | 231                      | 235              | 238      | 241                         | 242                           | 241                      |
| 244          | 243                    | 245                      | 245                 | 244                      | 244              | 244      | 244                         | 245                           | 244                      |
| 245          | 246                    | 244                      | 246                 | 245                      | 242              | 245      | 245                         | 243                           | 245                      |
| 246 (lowest) | 243                    | 246                      | 244                 | 245                      | 246              | 246      | 246                         | 246                           | 246                      |

<sup>1</sup> 2 health centers/clinics are tied for the lowest rank using simple addition of DHS items (#245).

**Table S5: Eigenvalues for PCA method**

|                               | Eigenvalue for Component 1 | Proportion of variance explained |
|-------------------------------|----------------------------|----------------------------------|
| <b>Hospitals</b>              |                            |                                  |
| SARA tracer items             | 3.20                       | 0.16                             |
| DHS items                     | 3.73                       | 0.13                             |
| WHO standards items           | 6.03                       | 0.12                             |
| <b>Health centers/clinics</b> |                            |                                  |
| SARA tracer items             | 2.51                       | 0.17                             |
| DHS items                     | 3.64                       | 0.12                             |
| WHO standards items           | 6.55                       | 0.15                             |

Table S6. Summary of item availability in hospitals and health centers/clinics

|                                                                                                     | Hospital<br>N=160   |      | Health center/<br>clinic<br>N=246 |      | SARA | DHS | WHO<br>standards |
|-----------------------------------------------------------------------------------------------------|---------------------|------|-----------------------------------|------|------|-----|------------------|
|                                                                                                     | No.                 | %    | No.                               | %    |      |     |                  |
| <b>Medicines &amp; Commodities</b>                                                                  |                     |      |                                   |      |      |     |                  |
| <b><i>Routine Newborn Care</i></b>                                                                  |                     |      |                                   |      |      |     |                  |
| Chlorohexidine gel in delivery room or nurse/staff station                                          | 90/159 <sup>1</sup> | 56.6 | 119/244 <sup>1</sup>              | 48.8 |      | X   |                  |
| Chlorohexidine gel in facility                                                                      | 98/159 <sup>1</sup> | 61.6 | 133                               | 54.1 |      |     | X                |
| Injectable vitamin K in facility                                                                    | 151                 | 94.4 | 183                               | 74.4 |      |     | X                |
| Tetracycline ointment in delivery room or nurse/staff station                                       | 145                 | 90.6 | 214                               | 87.0 |      | X   |                  |
| Tetracycline ointment in facility                                                                   | 152                 | 95.0 | 229                               | 93.1 | X    |     | X                |
| BCG vaccine <sup>2</sup>                                                                            | 136                 | 85.0 | 219                               | 89.0 |      |     | X                |
| <b><i>Basic EmONC</i></b>                                                                           |                     |      |                                   |      |      |     |                  |
| Magnesium sulphate in delivery room or nurse/staff station                                          | 149                 | 93.1 | 173/245 <sup>1</sup>              | 70.6 |      | X   |                  |
| Magnesium sulphate in facility                                                                      | 153                 | 95.6 | 181                               | 73.6 | X    |     | X                |
| Calcium gluconate in facility                                                                       | 140                 | 87.5 | 112                               | 45.5 |      |     | X                |
| At least one antihypertensive (hydralazine, nifedipine, or methyldopa)                              | 158                 | 98.8 | 210                               | 85.4 |      |     | X                |
| Injectable diazepam in facility                                                                     | 153                 | 95.6 | 159                               | 64.6 |      |     | X                |
| Oxytocin in delivery room or nurse/staff station                                                    | 152                 | 95.0 | 209                               | 85.0 |      | X   |                  |
| Oxytocin in facility                                                                                | 159                 | 99.4 | 231                               | 93.9 | X    |     | X                |
| Misoprostol in facility                                                                             | 144                 | 90.0 | 123                               | 50.0 |      |     | X                |
| Injectable ergometrine/methergine in facility                                                       | 139                 | 86.9 | 132                               | 53.7 |      |     | X                |
| Injectable ampicillin                                                                               | 153                 | 95.6 | 183                               | 74.4 |      |     | X                |
| Injectable gentamicin                                                                               | 146                 | 91.3 | 211                               | 85.8 |      |     | X                |
| Injectable metronidazole                                                                            | 149                 | 93.1 | 130                               | 52.8 |      |     | X                |
| At least one broad-spectrum injectable antibiotic: ampicillin or gentamicin                         | 157                 | 98.1 | 231                               | 93.9 | X    | X   |                  |
| IV solution in delivery room or nurse/staff station and infusion set (cannula, needle, and syringe) | 149                 | 93.1 | 211                               | 85.8 |      | X   |                  |
| IV solution in facility and infusion set (cannula, needle, and syringe)                             | 152                 | 95.0 | 221                               | 89.8 | X    |     |                  |
| <b><i>Comprehensive EmONC</i></b>                                                                   |                     |      |                                   |      |      |     |                  |
| Blood transfusion available at all times facility open                                              | 122                 | 76.3 | --                                | --   | X    |     |                  |
| Access to blood bank either inside or outside facility                                              | 121                 | 75.6 | --                                | --   | X    |     |                  |
| Lignocaine/lidocaine                                                                                | 156                 | 97.5 | --                                | --   | X    |     |                  |
| <b><i>Small and Sick Newborn Care</i></b>                                                           |                     |      |                                   |      |      |     |                  |
| Dexamethasone / betamethasone                                                                       | 153                 | 95.6 | 146                               | 59.3 |      |     | X                |
| Nevirapine (NVP)                                                                                    | 152                 | 95.0 | 172                               | 69.9 |      |     | X                |
| Benzathine benzylpenicillin                                                                         | 113                 | 70.6 | 147/244 <sup>1</sup>              | 60.2 |      |     | X                |
| <b>Equipment, Supplies &amp; Amenities</b>                                                          |                     |      |                                   |      |      |     |                  |
| <b><i>Routine Delivery</i></b>                                                                      |                     |      |                                   |      |      |     |                  |
| Blood pressure apparatus                                                                            | 152                 | 95.0 | 216                               | 87.8 |      | X   |                  |

|                                                                                                                       | Hospital<br>N=160 |      | Health center/<br>clinic<br>N=246 |      | SARA | DHS | WHO<br>standards |
|-----------------------------------------------------------------------------------------------------------------------|-------------------|------|-----------------------------------|------|------|-----|------------------|
|                                                                                                                       | No.               | %    | No.                               | %    |      |     |                  |
| Alcohol hand scrub and/or soap and running water for staff handwashing                                                | 149               | 93.1 | 223                               | 90.7 |      | X   | X                |
| Sterile gloves                                                                                                        | 156               | 97.5 | 243                               | 98.8 | X    | X   |                  |
| <b><i>Routine Newborn Care</i></b>                                                                                    |                   |      |                                   |      |      |     |                  |
| Sterile cord ties/clamp and scissors/blades (either in sealed delivery kit or separate)                               | 160               | 100  | 241                               | 98.0 | X    | X   | X                |
| Infant weight scale                                                                                                   | 156               | 97.5 | 235/245 <sup>1</sup>              | 95.9 |      | X   | X                |
| <b><i>Basic EmONC</i></b>                                                                                             |                   |      |                                   |      |      |     |                  |
| Obstetric forceps and/or functioning electrical vacuum extractor                                                      | 155               | 96.9 | 118                               | 48.0 | X    | X   | X                |
| Dilatation and curettage (D&C) kit and/or manual vacuum aspiration (MVA) and cannula                                  | 153               | 95.6 | 208                               | 84.6 | X    | X   | X                |
| Functional suction apparatus for use with catheter and/or manual suction device for fluid extraction                  | 157               | 98.1 | 210                               | 85.4 | X    | X   | X                |
| Self-inflating bag and newborn masks (size 0 and size 1) for resuscitation                                            | 135               | 84.4 | 158                               | 64.2 | X    | X   | X                |
| Resuscitation table/trolley with light source                                                                         | 154               | 96.3 | 194/246 <sup>1</sup>              | 79.2 |      |     | X                |
| <b><i>Comprehensive EmONC</i></b>                                                                                     |                   |      |                                   |      |      |     |                  |
| Functional sterilizing equipment <sup>3</sup>                                                                         | 139               | 86.9 | --                                | --   | X    | X   | X                |
| <b><i>Small and Sick Newborn Care</i></b>                                                                             |                   |      |                                   |      |      |     |                  |
| Functional incubator                                                                                                  | 120               | 75.0 | --                                | --   | X    |     | X                |
| Oxygen supply                                                                                                         | 140               | 87.5 | --                                | --   |      |     | X                |
| Pulse oximeter                                                                                                        | 123               | 76.9 | --                                | --   |      |     | X                |
| <b><i>Amenities – Routine Delivery</i></b>                                                                            |                   |      |                                   |      |      |     |                  |
| Delivery bed                                                                                                          | 160               | 100  | 244                               | 99.2 | X    | X   |                  |
| Private delivery room or visual privacy ensured in delivery area                                                      | 137               | 85.6 | 214                               | 87.0 |      |     | X                |
| Newborn corner                                                                                                        | 146               | 91.3 | 177                               | 72.0 |      |     | X                |
| Water outlet on site                                                                                                  | 156               | 97.5 | 208                               | 84.6 |      | X   |                  |
| Electricity available at all times when facility was open in last 7 days and/or back-up energy source                 | 152               | 95.0 | 177                               | 72.0 |      | X   | X                |
| Functional toilet available for patient use                                                                           | 160               | 100  | 236                               | 95.9 |      | X   |                  |
| <b>Staffing &amp; Systems to Support Quality</b>                                                                      |                   |      |                                   |      |      |     |                  |
| <b><i>Routine Delivery</i></b>                                                                                        |                   |      |                                   |      |      |     |                  |
| Skilled birth attendant present at facility or on call 24 hours                                                       | 158               | 98.8 | 232                               | 94.3 | X    | X   | X                |
| Ratio of skilled health personnel to delivery volume meets or exceeds desired scenario in FIGO statement <sup>4</sup> | 151               | 94.4 | 234                               | 95.1 |      |     | X                |
| Management protocols on selected obstetric topics (FMOH, 2010)                                                        | 81                | 50.6 | 76                                | 30.9 | X    | X   |                  |
| <b><i>Comprehensive EmONC</i></b>                                                                                     |                   |      |                                   |      |      |     |                  |
| Skilled provider available 24h to provide C-section                                                                   | 151               | 94.4 | --                                | --   | X    |     |                  |
| At least one staff trained in anesthesia                                                                              | 155               | 96.9 | --                                | --   | X    |     | X                |

|                                                                                                                      | Hospital<br>N=160    |      | Health center/<br>clinic<br>N=246 |      | SARA | DHS | WHO<br>standards |
|----------------------------------------------------------------------------------------------------------------------|----------------------|------|-----------------------------------|------|------|-----|------------------|
|                                                                                                                      | No.                  | %    | No.                               | %    |      |     |                  |
| <b>Information Systems &amp; Quality Improvement Processes</b>                                                       |                      |      |                                   |      |      |     |                  |
| Functional mechanism for reporting data on maternal deaths to the Maternal and Perinatal Death Surveillance Response | 149/159 <sup>1</sup> | 93.7 | 210/233 <sup>5</sup>              | 90.1 |      |     | X                |
| Conducts maternal death reviews                                                                                      | 142/159 <sup>1</sup> | 89.3 | 170/231 <sup>1,5</sup>            | 73.6 |      |     | X                |
| Produces monthly reports for the HMIS and receives feedback that includes recommendations for action                 | 133/159 <sup>1</sup> | 83.6 | 223/245 <sup>1</sup>              | 91.0 |      |     | X                |
| Has a performance monitoring team that meets at least quarterly                                                      | 142/154 <sup>6</sup> | 92.2 | 211/229 <sup>1,6</sup>            | 92.1 |      |     | X                |
| <b>Referral Systems</b>                                                                                              |                      |      |                                   |      |      |     |                  |
| Access to a functional ambulance/car on-site for emergency transportation <sup>7</sup>                               | 146                  | 91.3 | 143                               | 58.1 | X    | X   | X                |
| Printed referral form observed                                                                                       | 127/132 <sup>8</sup> | 96.2 | 207/241 <sup>8</sup>              | 85.9 |      |     | X                |
| Functional system for recording and sharing outcomes of cases referred in and out                                    | 134/158 <sup>9</sup> | 84.8 | 171/244 <sup>9</sup>              | 70.1 |      |     | X                |
| <b>Performance of Signal Functions</b>                                                                               |                      |      |                                   |      |      |     |                  |
| <b>Routine Newborn Care</b>                                                                                          |                      |      |                                   |      |      |     |                  |
| Skin-to-skin care                                                                                                    | 151                  | 94.4 | 229/245 <sup>1</sup>              | 93.5 |      | X   |                  |
| Assist mother to breastfeed                                                                                          | 160                  | 100  | 245                               | 99.6 |      | X   |                  |
| <b>Basic EmONC</b>                                                                                                   |                      |      |                                   |      |      |     |                  |
| Provided parenteral anticonvulsants to manage high blood pressure in pregnancy                                       | 149                  | 93.1 | 101                               | 41.1 |      | X   | X                |
| Provided parenteral or oral uterotonics to prevent or treat PPH                                                      | 153                  | 95.6 | 172                               | 69.9 |      | X   | X                |
| Performed manual removal of placenta                                                                                 | 152                  | 95.0 | 181/244 <sup>1</sup>              | 74.2 |      | X   | X                |
| Provided instrument/ assisted deliveries                                                                             | 153                  | 95.6 | 128/244 <sup>1</sup>              | 52.5 |      | X   | X                |
| Provided parenteral antibiotics for infections related to pregnancy, abortion, labor or delivery                     | 155                  | 96.9 | 187/244 <sup>1</sup>              | 76.6 |      | X   | X                |
| Performed neonatal resuscitation                                                                                     | 156                  | 97.5 | 178/244 <sup>1</sup>              | 73.0 |      | X   | X                |
| <b>Comprehensive EmONC</b>                                                                                           |                      |      |                                   |      |      |     |                  |
| Performed blood transfusions for maternity care                                                                      | 125                  | 78.1 | --                                | --   |      | X   | X                |
| Performed cesarean deliveries                                                                                        | 150                  | 93.8 | --                                | --   |      | X   | X                |
| <b>Small and Sick Newborn Care</b>                                                                                   |                      |      |                                   |      |      |     |                  |
| Provided antenatal corticosteroids for fetal lung maturation                                                         | 141                  | 88.1 | 36/244 <sup>1</sup>               | 14.8 |      |     | X                |
| Neonatal intensive care provided at facility                                                                         | 143                  | 89.4 | --                                | --   |      |     | X                |

<sup>1</sup> Denominator adjusted to exclude responses that are missing, "no response," or "don't know".

<sup>2</sup> Several hospitals (n=8) and health centers/clinics (n=12) do not offer immunization services and were not asked about the availability of BCG vaccine; they are classified as not having vaccines available.

<sup>3</sup> At least one of the following: electric autoclave, non-electric autoclave, or electric dry heat sterilizer. For sterilizing equipment to be considered functional, electric equipment must be observed and assessed as functional. Non-electric equipment must have an observed heat source.



<sup>4</sup> For hospitals with surgical capacity (i.e., CEmONC), FIGO statement recommends the following desired staffing requirements: at least 5 personnel per shift for  $\leq 1000$  deliveries per year; 7 personnel per shift for 1001-2000 deliveries; and 10 personnel per shift for 2001-3000 deliveries, etc. Annual delivery volume is divided by 12 to give monthly estimate. Required staffing numbers are multiplied by two assuming two 12-hour shift pattern. Hospitals must also indicate that they have a skilled provider who can perform C-section present or on call 24h and skilled provider who can administer anesthesia. Skilled health personnel for delivery care include ObGyn, general practitioner (physician), health officer, emergency surgery and obstetrics officer, nurse, and midwife (4).

For health centers with no surgical capacity (i.e., BEmONC), FIGO statement recommends the following desired staffing requirements: at least 3 personnel per shift for  $\leq 1000$  deliveries per year; 5 personnel per shift for 1001-2000 deliveries; and 6 personnel per shift for 2001-3000 deliveries. Annual delivery volume is divided by 12 to give monthly estimate. Required staffing numbers are multiplied by two assuming two 12-hour shift pattern. Skilled health personnel for delivery care include ObGyn, general practitioner (physician), health officer, emergency surgery and obstetrics officer, nurse, and midwife (4).

<sup>5</sup> Private clinics (n=13) were not asked about reporting to the Maternal and Perinatal Death Surveillance Response or maternal death reviews. Thus, it is not considered a required input for private clinics to be counted as ready.

<sup>6</sup> Private hospitals (n=6) and private/non-profit clinics/centers (n=16) were not asked about a PMT. Thus, it is not considered a required input for private facilities to be considered ready.

<sup>7</sup> Functional refers to all working status, fuel and driver availability within 15 minutes of need being recognized.

<sup>8</sup> Only facilities that make referrals to other facilities were asked this question; n=33 facilities (28 hospitals and 5 health centers/clinics) do not make referrals. Thus, it is not considered a required input for facilities that do not make referrals.

<sup>9</sup> Only facilities that refer patients to other facilities and/or receive referrals from other facilities were asked about the system for sharing outcomes for cases referred in and out.

**Table S7: Differences in childbirth service readiness scores and rankings across indices**

|                                        | Hospitals (n=160) |                   |       |      | Health centers / clinics (n=246) |                   |       |      |
|----------------------------------------|-------------------|-------------------|-------|------|----------------------------------|-------------------|-------|------|
|                                        | Median            | IQR<br>(p25, p75) | Mean  | SD   | Median                           | IQR<br>(p25, p75) | Mean  | SD   |
| <b>Difference in scores</b>            |                   |                   |       |      |                                  |                   |       |      |
| Simple addition (SARA-WHO standards)   | 0.00              | -0.04, 0.04       | 0.00  | 0.06 | 0.07                             | 0.02, 0.14        | 0.08  | 0.09 |
| Weighted addition (SARA-WHO standards) | -0.01             | -0.07, 0.03       | -0.02 | 0.07 | 0.05                             | -0.03, 0.12       | 0.05  | 0.11 |
| PCA (SARA-WHO standards)               | -0.02             | -0.08, 0.01       | -0.04 | 0.10 | 0.07                             | 0.01, 0.14        | 0.08  | 0.10 |
| Simple addition (DHS-WHO standards)    | 0.01              | -0.02, 0.04       | 0.01  | 0.05 | 0.05                             | 0.00, 0.09        | 0.05  | 0.07 |
| Weighted addition (DHS-WHO standards)  | 0.02              | 0.00, 0.05        | 0.03  | 0.05 | 0.06                             | 0.03, 0.11        | 0.07  | 0.07 |
| PCA (DHS-WHO standards)                | 0.01              | -0.01, 0.04       | 0.02  | 0.07 | 0.00                             | -0.04, 0.06       | 0.01  | 0.09 |
| Simple addition (DHS-SARA)             | 0.01              | -0.02, 0.05       | 0.01  | 0.06 | -0.03                            | -0.07, 0.03       | -0.03 | 0.07 |
| Weighted addition (DHS-SARA)           | 0.03              | 0.00, 0.09        | 0.04  | 0.08 | 0.02                             | -0.05, 0.11       | 0.02  | 0.11 |
| PCA (DHS-SARA)                         | 0.04              | 0.01, 0.09        | 0.06  | 0.14 | -0.06                            | -0.12, -0.01      | -0.07 | 0.08 |
| <b>Difference in rankings</b>          |                   |                   |       |      |                                  |                   |       |      |
| Simple addition (SARA-WHO standards)   | -3                | -36, 19.5         | -9.6  | 41.9 | -9                               | -40, 19           | -13.9 | 52.6 |
| Weighted addition (SARA-WHO standards) | -0.5              | -36, 23.5         | -7.1  | 44.5 | -6.5                             | -46, 30           | -7.9  | 59.1 |
| PCA (SARA-WHO standards)               | 1                 | -34, 25.5         | -5.7  | 44.1 | 0                                | -33, 29           | -2.8  | 53.2 |
| Simple addition (DHS-WHO standards)    | -6                | -27.5, 17         | -7.4  | 38.5 | -3.5                             | -28, 20           | -4.4  | 39.6 |
| Weighted addition (DHS-WHO standards)  | -3                | -25, 17.5         | -4.8  | 40.9 | 0                                | -26, 19           | -1.9  | 35.4 |
| PCA (DHS-WHO standards)                | 3                 | -20, 19           | -2.4  | 36.3 | 1                                | -23, 23           | 0.0   | 42.5 |
| Simple addition (DHS-SARA)             | 0                 | -15, 22           | 2.2   | 34.6 | 10                               | -18, 37           | 9.5   | 46.8 |
| Weighted addition (DHS-SARA)           | 0                 | -23, 31.5         | 2.4   | 49.6 | 6                                | -33, 41           | 6.0   | 61.5 |
| PCA (DHS-SARA)                         | 2                 | -18, 19.5         | 3.3   | 40.4 | 0.5                              | -23, 26           | 2.7   | 47.2 |

**Table S8: Comparison of domain readiness scores (simple addition of items within each domain)**

| Domain                                       | Hospitals (n=160) |                   |                  |          |          | Health centers / clinics (n=246) |                |                  |          |          |
|----------------------------------------------|-------------------|-------------------|------------------|----------|----------|----------------------------------|----------------|------------------|----------|----------|
|                                              | No. items         | Cronbach alpha    | Median [IQR]     | Skewness | Kurtosis | No. items                        | Cronbach alpha | Median [IQR]     | Skewness | Kurtosis |
| SARA Medicines                               | 8                 | 0.48              | 1.00 [0.88-1.00] | -1.53    | 5.38     | 5                                | 0.43           | 1.00 [0.80-1.00] | -2.04    | 9.00     |
| DHS Medicines                                | 6                 | 0.37              | 0.83 [0.83-1.00] | -1.50    | 6.25     | 6                                | 0.45           | 0.83 [0.67-1.00] | -1.03    | 4.17     |
| WHO Standards Medicines                      | 17                | 0.62              | 0.94 [0.85-1.00] | -2.49    | 15.16    | 17                               | 0.76           | 0.71 [0.59-0.82] | -0.66    | 3.22     |
| SARA Equipment and Supplies                  | 10                | 0.38 <sup>3</sup> | 1.00 [0.90-1.00] | -1.52    | 5.54     | 8                                | 0.43           | 0.88 [0.63-0.88] | -0.63    | 2.84     |
| DHS Equipment and Supplies                   | 11                | 0.38 <sup>3</sup> | 1.00 [0.91-1.00] | -2.11    | 8.55     | 10                               | 0.42           | 0.90 [0.80-0.90] | -0.97    | 4.16     |
| WHO Standards Equipment, Supplies, Amenities | 15                | 0.50 <sup>3</sup> | 0.93 [0.87-1.00] | -1.90    | 8.15     | 11                               | 0.56           | 0.82 [0.73-0.91] | -1.00    | 4.16     |
| DHS General <sup>1</sup>                     | 5                 | --                | 1.00 [1.00-1.00] | -2.01    | 5.91     | 5                                | 0.25           | 0.80 [0.60-1.00] | -0.74    | 3.02     |
| SARA Staffing and Guidelines                 | 4                 | 0.23              | 0.75 [0.75-1.00] | -1.04    | 4.75     | 2                                | --             | 0.50 [0.50-1.00] | 0.29     | 2.67     |
| DHS Guidelines <sup>2</sup>                  | 1                 | --                | --               | --       | --       | 1                                | --             | --               | --       | --       |
| WHO Standards Staffing and Systems           | 10                | 0.48              | 1.00 [0.90-1.00] | -1.73    | 6.39     | 9                                | 0.59           | 0.89 [0.78-1.00] | -1.26    | 4.93     |
| DHS CEmONC Functions                         | 7                 | 0.67              | 1.00 [0.86-1.00] | -3.25    | 16.80    | 5                                | 0.61           | 0.60 [0.40-0.80] | -0.38    | 2.15     |
| DHS Newborn Functions                        | 3                 | --                | 1.00 [1.00-1.00] | -3.07    | 10.40    | 3                                | 0.04           | 1.00 [0.67-1.00] | -1.13    | 3.21     |
| WHO Standards Signal Functions               | 10                | 0.78              | 1.00 [0.90-1.00] | -3.33    | 17.08    | 7                                | 0.61           | 0.57 [0.43-0.71] | -0.40    | 2.34     |

<sup>1</sup> The DHS general domain includes amenities, transportation, and staff. There is no equivalent in the SARA or WHO standards index. DHS general domain items match items found in the SARA equipment and supplies domain; SARA staffing and guidelines domain; WHO standards equipment, supplies, and amenities domain; and the WHO standards staffing and systems domain.

<sup>2</sup> The DHS guidelines domain is calculated based on one item: Management protocol on selected obstetric topics, 2010 (2). Other items included in the domain as originally conceptualized (e.g., trainings) were not available in the PMA-ET survey.

<sup>3</sup> Delivery kit (sterile clamp and ties) and delivery bed dropped from analysis because constant.

Table S9a. Spearman's ranked correlation coefficients for hospital domain scores (n=160)

| Domain                                       | SARA medicines | DHS medicines | WHO Standards medicines | SARA equipment and supplies | DHS equipment and supplies | WHO standards equipment, supplies, amenities | SARA staffing and guidelines | DHS guidelines | WHO standards staffing and systems | DHS CEmONC functions | DHS newborn functions | WHO standards signal functions |
|----------------------------------------------|----------------|---------------|-------------------------|-----------------------------|----------------------------|----------------------------------------------|------------------------------|----------------|------------------------------------|----------------------|-----------------------|--------------------------------|
| SARA Medicines                               | 1.00           |               |                         |                             |                            |                                              |                              |                |                                    |                      |                       |                                |
| DHS Medicines                                | 0.26***        | 1.00          |                         |                             |                            |                                              |                              |                |                                    |                      |                       |                                |
| WHO Standards Medicines                      | 0.29***        | 0.52***       | 1.00                    |                             |                            |                                              |                              |                |                                    |                      |                       |                                |
| SARA Equipment and Supplies                  | 0.35***        | 0.13          | 0.23**                  | 1.00                        |                            |                                              |                              |                |                                    |                      |                       |                                |
| DHS Equipment and Supplies                   | 0.31***        | 0.13          | 0.22**                  | 0.73***                     | 1.00                       |                                              |                              |                |                                    |                      |                       |                                |
| WHO Standards Equipment, Supplies, Amenities | 0.34***        | 0.15          | 0.26**                  | 0.71***                     | 0.67***                    | 1.00                                         |                              |                |                                    |                      |                       |                                |
| SARA Staffing and Guidelines                 | 0.25**         | 0.11          | 0.21**                  | 0.35***                     | 0.43***                    | 0.40***                                      | 1.00                         |                |                                    |                      |                       |                                |
| DHS Guidelines                               | 0.11           | 0.03          | 0.10                    | 0.27***                     | 0.35***                    | 0.30***                                      | 0.91***                      | 1.00           |                                    |                      |                       |                                |
| WHO Standards Staffing and Systems           | 0.28***        | 0.25**        | 0.10                    | 0.30***                     | 0.19**                     | 0.23**                                       | 0.23**                       | 0.07           | 1.00                               |                      |                       |                                |
| DHS CEmONC Functions                         | 0.47***        | 0.03          | 0.21**                  | 0.27***                     | 0.27***                    | 0.23**                                       | 0.18*                        | 0.00           | 0.30***                            | 1.00                 |                       |                                |
| DHS Newborn Functions                        | 0.11           | 0.16*         | 0.08                    | 0.17*                       | 0.18*                      | 0.14                                         | -0.01                        | -0.11          | 0.18*                              | 0.15                 | 1.00                  |                                |
| WHO Standards Signal Functions               | 0.47***        | 0.00          | 0.25**                  | 0.28***                     | 0.24**                     | 0.22**                                       | 0.21**                       | 0.04           | 0.29***                            | 0.92***              | 0.13                  | 1.00                           |

\*denotes p&lt;0.05; \*\*denotes p&lt;0.01; \*\*\*denotes p&lt;0.001

**Table S9b. Spearman's ranked correlation coefficients for health center/clinic domain scores (n=246)**

| Domain                                       | SARA medicines | DHS medicines | WHO standards medicines | SARA equipment and supplies | DHS equipment and supplies | WHO standards equipment, supplies, amenities | SARA staffing and guidelines | DHS guidelines | WHO standards staffing and systems | DHS CEmONC functions | DHS newborn functions | WHO standards signal functions |
|----------------------------------------------|----------------|---------------|-------------------------|-----------------------------|----------------------------|----------------------------------------------|------------------------------|----------------|------------------------------------|----------------------|-----------------------|--------------------------------|
| SARA Medicines                               | 1.00           |               |                         |                             |                            |                                              |                              |                |                                    |                      |                       |                                |
| DHS Medicines                                | 0.70***        | 1.00          |                         |                             |                            |                                              |                              |                |                                    |                      |                       |                                |
| WHO Standards Medicines                      | 0.51***        | 0.60***       | 1.00                    |                             |                            |                                              |                              |                |                                    |                      |                       |                                |
| SARA Equipment and Supplies                  | 0.25***        | 0.26***       | 0.49***                 | 1.00                        |                            |                                              |                              |                |                                    |                      |                       |                                |
| DHS Equipment and Supplies                   | 0.25***        | 0.29***       | 0.50***                 | 0.86***                     | 1.00                       |                                              |                              |                |                                    |                      |                       |                                |
| WHO Standards Equipment, Supplies, Amenities | 0.28***        | 0.31***       | 0.52***                 | 0.75***                     | 0.81***                    | 1.00                                         |                              |                |                                    |                      |                       |                                |
| SARA Staffing and Guidelines                 | 0.28***        | 0.29***       | 0.30***                 | 0.30***                     | 0.31***                    | 0.28***                                      | 1.00                         |                |                                    |                      |                       |                                |
| DHS Guidelines                               | 0.21**         | 0.23***       | 0.24***                 | 0.23***                     | 0.23***                    | 0.23***                                      | 0.92***                      | 1.00           |                                    |                      |                       |                                |
| WHO Standards Staffing and Systems           | 0.30***        | 0.27***       | 0.37***                 | 0.43***                     | 0.28***                    | 0.32***                                      | 0.29***                      | 0.21**         | 1.00                               |                      |                       |                                |
| DHS CEmONC Functions                         | 0.31***        | 0.25***       | 0.36***                 | 0.24***                     | 0.26***                    | 0.27***                                      | 0.25***                      | 0.22***        | 0.21***                            | 1.00                 |                       |                                |
| DHS Newborn Functions                        | 0.18**         | 0.09          | 0.18**                  | 0.18**                      | 0.21***                    | 0.14*                                        | 0.07                         | 0.01           | 0.15*                              | 0.27***              | 1.00                  |                                |
| WHO Standards Signal Functions               | 0.29***        | 0.25***       | 0.37***                 | 0.28***                     | 0.31***                    | 0.31***                                      | 0.23***                      | 0.19**         | 0.23***                            | 0.95***              | 0.44***               | 1.00                           |

\*denotes p<0.05; \*\*denotes p<0.01; \*\*\*denotes p<0.001

**Figure S1: Histograms of childbirth service readiness indices**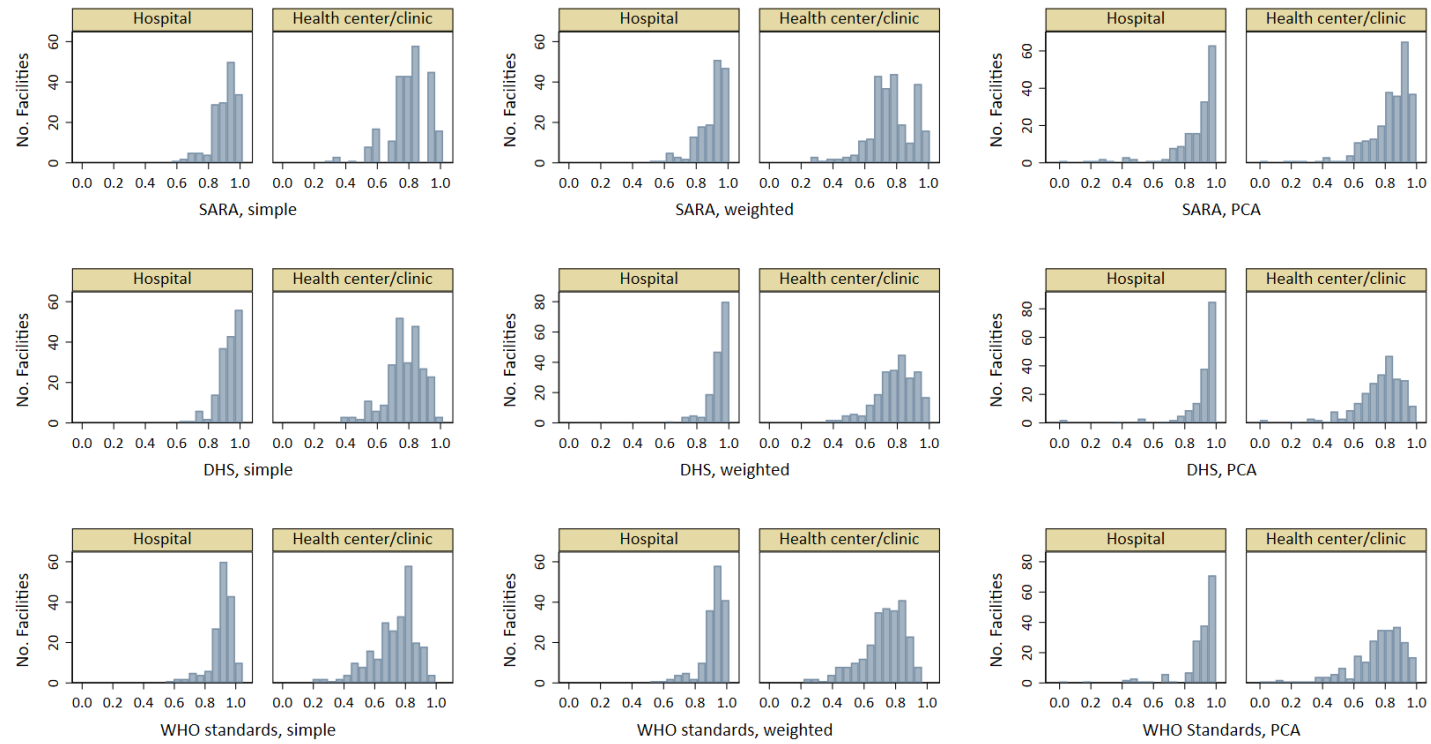

**Figure S2: Boxplots of differences in childbirth service readiness scores and rankings across indices**

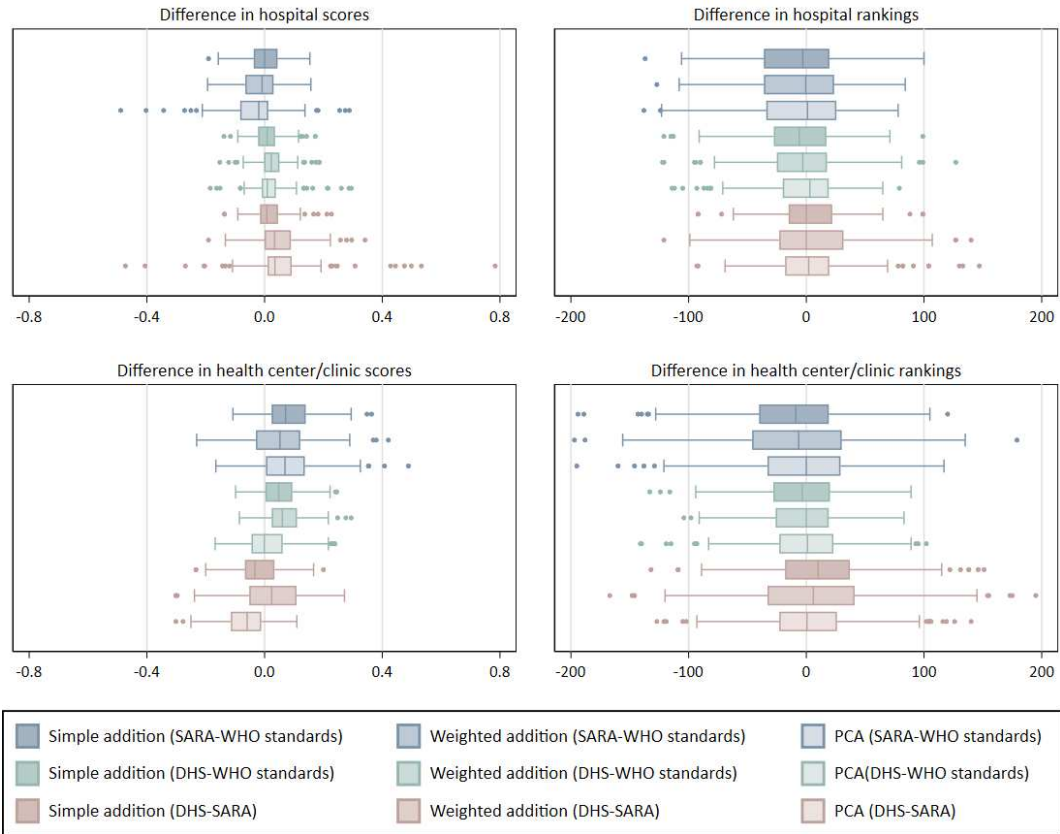

**Figure S3A: Correlation between hospital rankings by index**

Note: Hospitals are ranked from highest readiness (1) to lowest readiness (160). Ties are awarded 1 + the number of values that are higher.

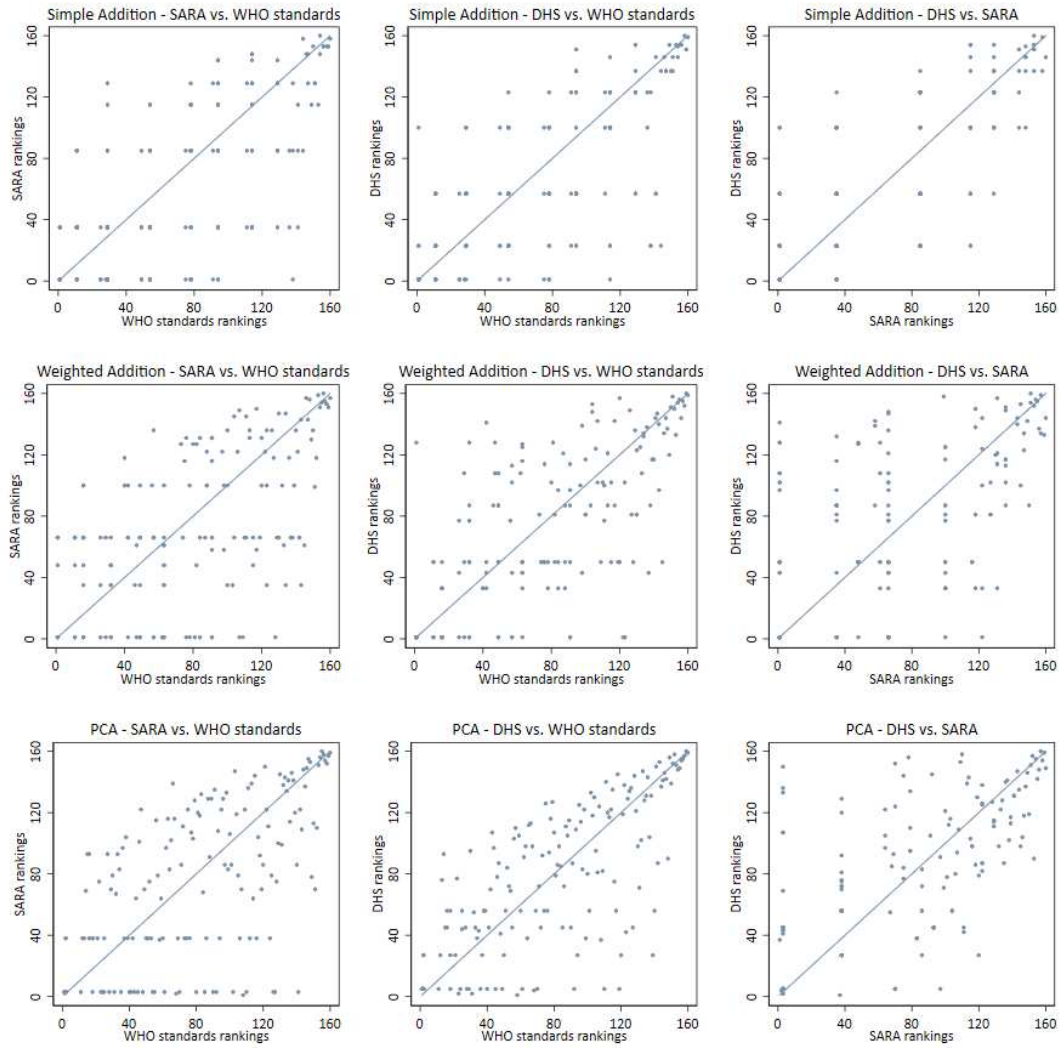



**Figure S3B: Correlation between health center/clinic rankings by index**

Note: Health centers/clinics are ranked from highest readiness (1) to lowest readiness (246). Ties are awarded 1 + the number of values that are higher.

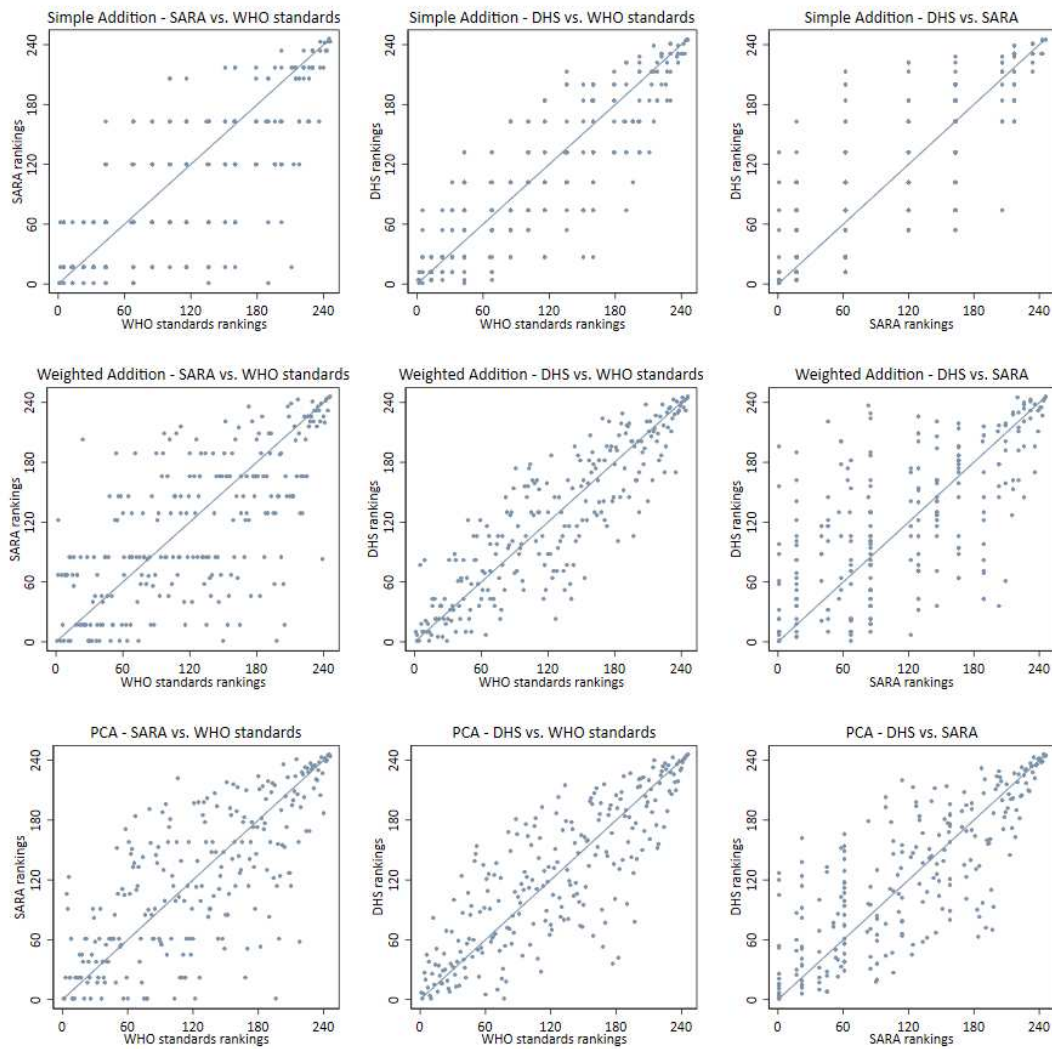

**References**

1. World Health Organization. Service Availability and Readiness Assessment (SARA): An annual monitoring system for service delivery reference manual. Geneva, Switzerland: World Health Organization; 2013.
2. Federal Democratic Republic of Ethiopia Ministry of Health. Management protocol on selected obstetric topics. Addis Ababa, Ethiopia: Federal Democratic Republic of Ethiopia Ministry of Health; 2010.
3. Wang W, Mallick L, Allen C, Pullum T. Effective coverage of facility delivery in Bangladesh, Haiti, Malawi, Nepal, Senegal, and Tanzania. DHS analytical studies no. 65. Rockville, MD, USA; 2018.
4. Stones W, Visser GHA, Theron G for the FIGO Safe Motherhood and Newborn Health Committee. FIGO Statement: Staffing requirements for delivery care, with special reference to low- and middle-income countries. *Int J Gynaecol Obstet*. 2019;146(1):3-7.
